# Supplementary material for: Comorbidity in Adult Bone Sarcoma Patients: A Population-Based Cohort Study
Source: Sarcoma. 2014 Feb 27;2014:690316. doi: 10.1155/2014/690316 (PMC3958755; doi:10.1155/2014/690316)
Supplement: Supplementary file 1 — The supplementary table, shows the ICD-8 and ICD-10 codes used to calculate the Charlson Comorbidity Index used in this analysis. [file 690316.f1.xlsx]

## Sheet: Ark1
Supplemental Table 1. ICD-8 and ICD-10 codes for the 19 medical conditions used to calculate the Charlson Comorbidity Index.
Conditions	ICD-8	ICD-10
Myocardial Infarct	410	I21; I22; I23
Congestive heart failure	427.09; 427.10; 427.11; 427.19; 428.99; 782.49	I50; I11.0; I13.0; I13.2
Peripheral vascular disease	440-445	I70; I71; I72; I73; I74; I77
Cerebrovascular disease	430-438	I60–I69; G45; G46
Dementia	290.09–290.19; 293.09	F00–F03; F05.1; G30
Chronic pulmonary disease	490–493; 515–518	J40–J47; J60–J67; J68.4; J70.1; J70.3; J84.1; J92.0; J96.1; J98.2; J98.3
Connective tissue disease	135.99; 446; 712; 716; 734	M05; M06; M08; M09; M30; M31; M32; M33; M34; M35; M36; D86
Ulcer disease	530.91; 530.98; 531–534	K22.1; K25–K28
Mild liver disease	571; 573.01; 573.04	B18; K70.0–K70.3; K70.9; K71; K73; K74; K76.0
Diabetes	249.00; 249.06; 249.07; 249.09; 250.00; 250.06; 250.07; 250.09	E10.0, E10.1; E10.9; E11.0; E11.1; E11.9; E14.0; E14.1; E14.9
Hemiplegia	344	G81; G82
Moderate/severe renal disease	403; 404; 580–583; 584; 590.09; 593.19; 753.10–753.19; 792	I12; I13; N00–N05; N07; N11; N14; N17–N19; Q61
Diabetes with end organ damage	249.01–249.05; 249.08; 250.01–250.05; 250.08	E10.2–E10.8; E11.2–E11.8; E14.2–E14.8
Any tumor *	140–169; 172-192.48; 193-194	C00-C39; C42-C46; C48; C50-C75
Leukemia	204–207	C91–C95
Lymphoma	200–203; 275.59	C81–C85; C88; C90; C96
Moderate/severe liver disease	070.00; 070.02; 070.04; 070.06; 070.08; 456.00–456.09; 573.00	B15.0; B16.0; B16.2; B19.0; K70.4; K72; K76.6; I85
Metastatic solid tumor	195–199	C76–C80
AIDS	079.83	B21–B24
NOTE: * Excluding tumors in soft tissue and bone (ICD-8; 170, 171, 192.49-99 and ICD-10; C40-C41, C47, C49)
